# Supplementary material for: Factors promoting the natural regeneration of Larix principis-rupprechtii plantation in the Lvliang Mountains of central China
Source: PeerJ journal article supplement (doi:10.7717/peerj.9339), 2020-06-17
Supplement: Impact_factor_data.zip [file Impact_factor_data.zip]

## Sheet: ��
plots	regeneration	height	elevation	slope	Litter thickness	Litter accumulation	DBH	tree height	Average crown	stand density	SOM	N	TP	AN	AP	AK
1	3	0.3	1984	32	2.4	52.39	37.35	19.56	6.25	249	19.59	0.22	0.13	22.64	80.42	456.41
2	4	0.32	1964	31	2.2	52.55	37.3	17.56	6.3	245	16.59	0.13	0.13	14.13	112.03	183.01
3	3	0.4	1984	30	2	51.57	37.36	18.56	6.2	250	17.81	0.13	0.14	12.82	43.03	128.8
4	16	0.5	1994	21	1.06	37.48	38.35	18.24	8.15	155	40.37	0.12	0.1	34.39	83.95	110.11
5	15	0.55	1995	19	1	37.47	37.45	16.24	9.45	150	18.55	0.2	0.15	19.88	128.11	103.34
6	18	0.6	1993	20	1.1	78.56	37.65	17.24	8.45	145	21.86	0.15	0.2	34.51	80.14	133.96
7	1	0.3	2015	22	4.34	106.29	33.65	14.82	8.55	210	58.97	0.1	0.15	75.57	93.47	224.22
8	2	0.4	2016	23	4	105.4	33.55	15.82	7.75	205	35.4	0.19	0.24	34.86	79.4	378.06
9	1	0.35	2017	21	4.4	107.5	34.35	16.82	7.55	200	18.84	0.2	0.36	34.91	88.03	118.64
10	50	0.8	2108	32	3.3	56.09	33.34	22.98	6.9	280	21	0.18	0.15	23.88	84.22	166.75
11	60	0.75	2106	31	3.2	55.5	31.34	23.98	6.58	275	10.5	0.11	0.27	11.51	98.48	224.63
12	56	0.9	2107	33	3.4	57.8	32.34	21.98	6.88	270	9.56	0.16	0.24	14.36	64.59	168.22
13	120	1.1	2049	15	3.1	61.51	35.43	13.99	5.78	205	18.55	0.15	0.11	19.74	78.87	178.62
14	130	1.12	2050	16	3	60	36.43	11.99	5.91	210	14.84	0.22	0.18	20.46	95.79	64.67
15	132	1.2	2048	17	3.1	62	32.43	12.99	6.91	200	12.79	0.18	0.23	26.91	53.41	80.55
16	160	1.3	2001	24	4	55	40.95	19.43	7.51	180	25.74	0.12	0.09	25.62	92.43	101.26
17	170	1.4	2000	22	4.04	56.06	38.95	18.43	6.81	170	12.32	0.12	0.13	11.41	121.33	156.21
18	175	1.45	2003	23	4.1	57	39.95	16.43	7.21	175	10.53	0.17	0.19	8.27	246.49	44.36
